# Supplementary material for: Development of hydrophobic reduced graphene oxide as a new efficient approach for photochemotherapy
Source: Royal Society of Chemistry journal article supplement (doi:10.1039/d0ra00186d), 2020-01-01
Supplement: d0ra00186d1.pdf [file d0ra00186d1.pdf]

## Supporting Documents

### Application of Reduced Graphene Oxide (rGO)

- Solar Cell
  - rGO could facilitate as efficient electrodes neither photoanode nor counter electrode to improve their efficiency performance.
- Fuel Cell
  - rGO that only permits protons transfer to cathode from anode, which would improve the efficiency and lifetime of fuel cell.
- Supercapacitors
  - rGO supercapacitors could charge and discharge in seconds and maintain all over tens of thousands of charging cycles.
- Wind Turbines
  - rGO could improved the efficiency of turbines, reducing the maintenance cost with more power output.
- Automotive
  - With being over 200 times stronger than steel property, rGO potentially replaced carbon fiber, steel, and aluminium components of vehicles as well as interior of car.
- Sensors
  - rGO have large surface-to-volume ratio, unique optical properties, excellent electrical conductivity, high carrier mobility and density, that can be greatly beneficial for sensor.
- Water Desalination
  - rGO shows antimicrobial properties, lowering membrane biofouling, hence improved the membrane lifetime and energy consumption of the water purification processes.
